# Supplementary material
Source: Research Square preprint supplement (doi:10.21203/rs.3.rs-9197295/v1)
Supplement: Supplementary file 1 [file 419d012b1dae8d84c9233d96.docx]

**Supporting Information**

**Synergistic Photophysical Modulation *via* Molecular Engineering: Carbazole-Based Copolymers Enabling High-Efficiency Ultralong Room-Temperature Phosphorescence**

Jian Chena, Haochen Guoa, Lin Zhanga, Wenqian Liua, Chuanyong Zonga,b,*, Shichun Jiangb, Xiangkui Renc,*

aSchool of Chemistry and Chemical Engineering, Shandong Provincial Key Laboratory of Extreme Environment-tolerant Specialty Chemicals, University of Jinan, Jinan 250022, P. R. China

bSchool of Materials Science and Engineering, Tianjin University, Tianjin 300072, P. R. China

cSchool of Chemical Engineering and Technology, Tianjin University, Tianjin 300072, P. R. China

*Corresponding author. E-mail address: chm_zongcy@ujn.edu.cn (Chuanyong Zong); renxiangkui@tju.edu.cn (Xiangkui Ren).

**Afterglow lifetime decay curve fitting.** The fitting of the phosphorescence lifetime decay curve of the P(KLNVC-*co*-AM) is described by the following expression:

(1)

Here, *B*i and *τ*idenote the amplitude and lifetime of each component in the multi-exponential decay profile, respectively.

The average lifetime is calculated from the function:

(2)

Where *φ*i is the amplitude fraction.

To obtain the intensity-averaged lifetime (*τ*int), is defined by the following function:


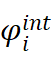

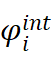


(3)

*τ*int is obtained from the following expression:

(4)

**
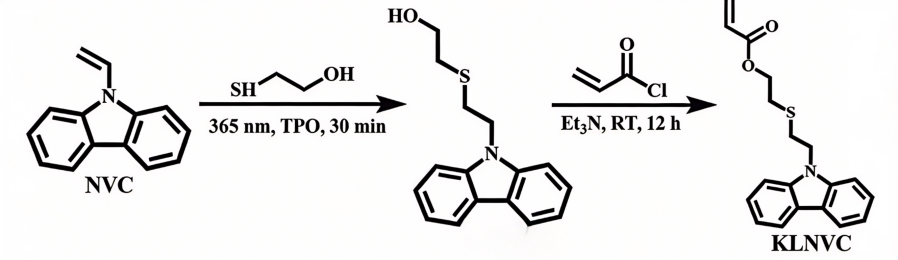
**

**Figure S1.** Schematic illustration of the synthesis of the KLNVC monomer.


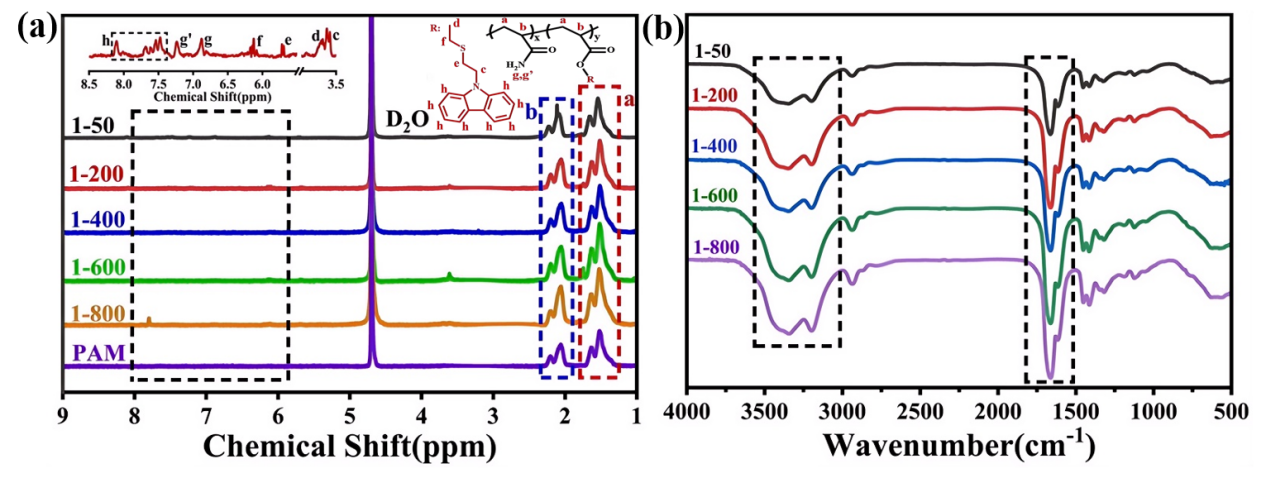
**Figure S2.** 1H NMR (a) and FT-IR (b) analysis of the as-synthesized copolymers with different monomer molar ratios.

As shown in Fig. S2a, the characteristic absorption peaks at 7.47 ~ 8.11 ppm were assigned to -CH- in the carbazole ring[1](#_ENREF_1" \o ",  #414). The feature peaks at 6.88 and 7.24 ppm belonged to -NH2 of the acrylamide moieties[2](#_ENREF_2" \o "Zhang, 2020 #413). The characteristic peaks at 3.63, 3.69, 5.72 and 6.13 ppm correspond to the carbazole-linked -CH2-, carbonyl-adjacent -CH2-, S-carbazole-bridged -CH2-, and S-bound -CH2-, respectively. Meanwhile, the feature stretching vibration peaks of -NH2 groups in the copolymers were observed at 3345 cm-1 (Fig. S2b). The stretching vibration absorption peaks of -CH3 and -CH2- moieties were observed at around 2939 cm-1. The characteristic stretching vibration peak of C = O group was appeared at 1763 cm-1. Notably, the feature peak of C = C bonds at 1629 cm-1 disappeared, indicating the successful synthesis of the carbazole-containing copolymers.


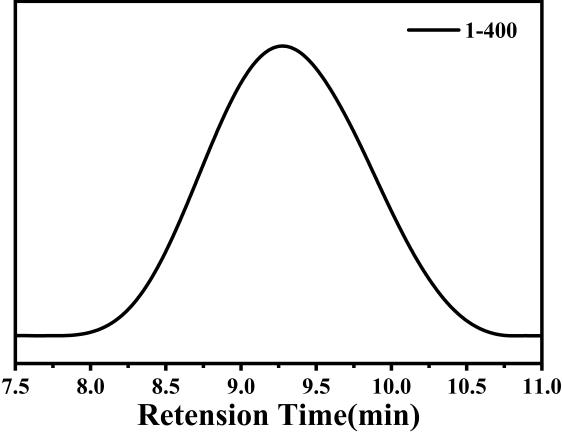


**Figure S3.** GPC curve of the as-synthesized P(KLNVC-*co*-AM).


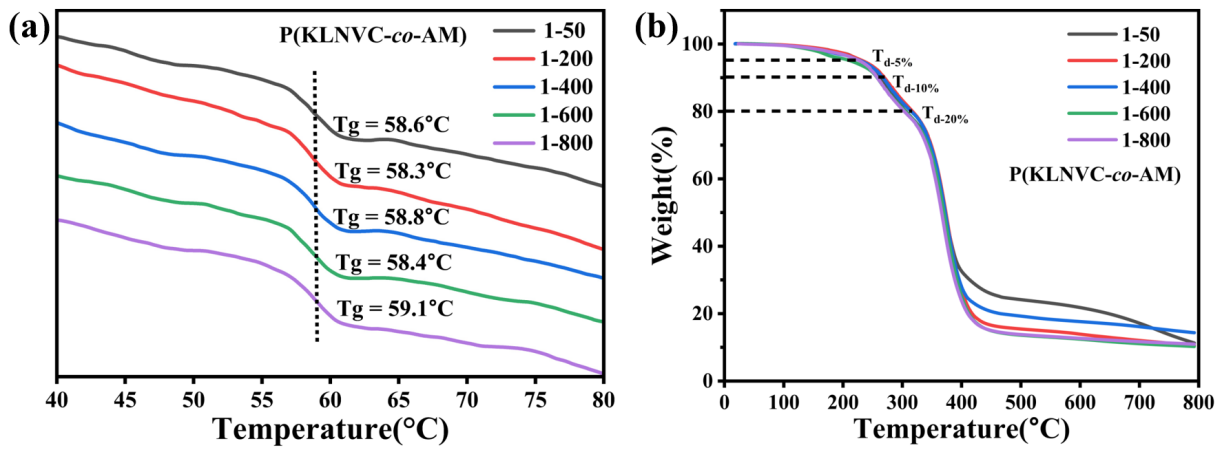


**Figure S4.** DSC (a) and TGA (b) curves of the as-synthesized P(KLNVC-*co*-AM).


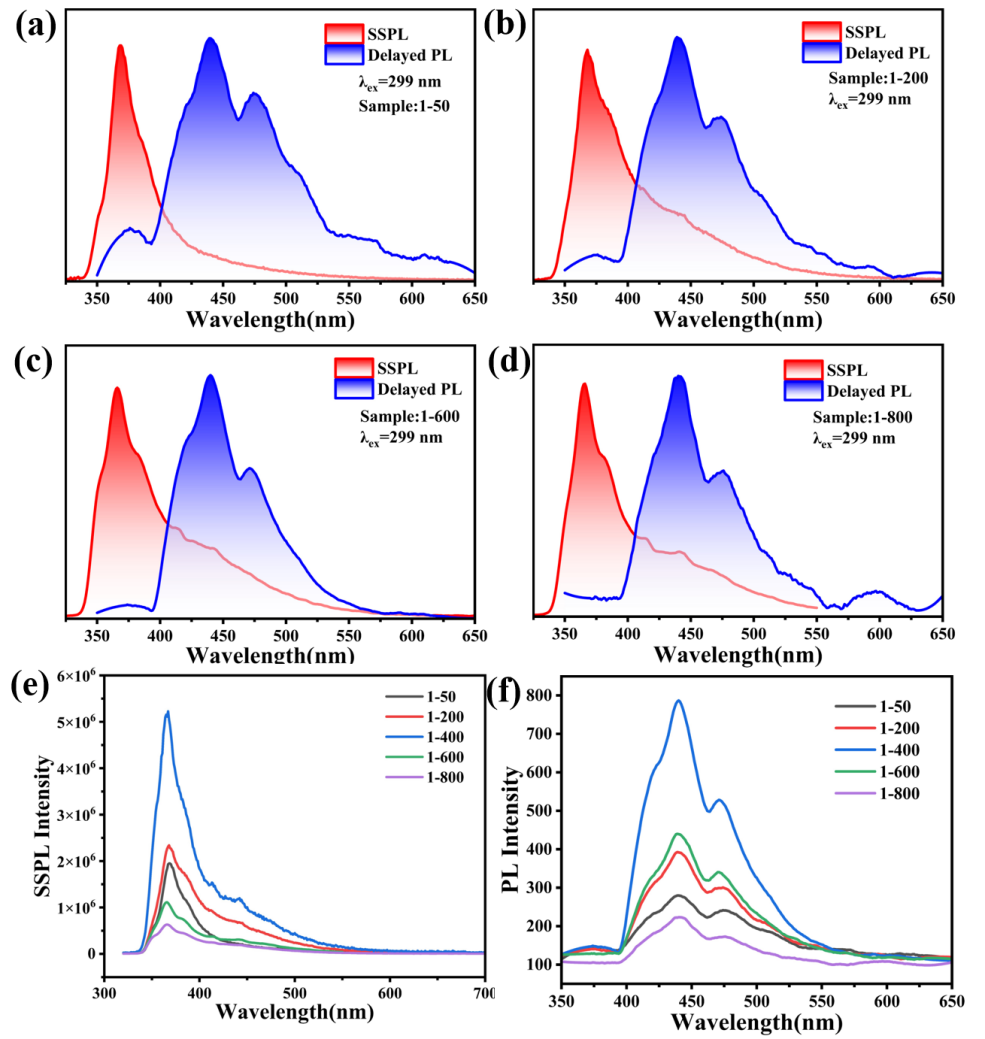


**Figure S5.** Steady-state (SSPL) and delayed PL spectra of P(KLNVC-*co*-AM).


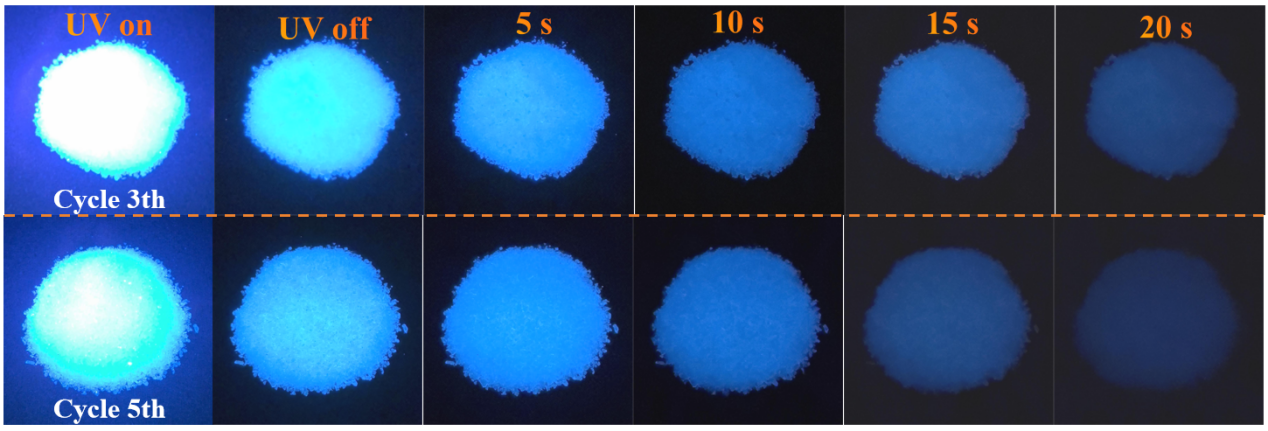


**Figure S6.** RTP photographs of the carbazole-copolymers (1-400) with UV light (365 nm, 56 mW/cm2, 10 s) excitation for 3 and 5 cycles.


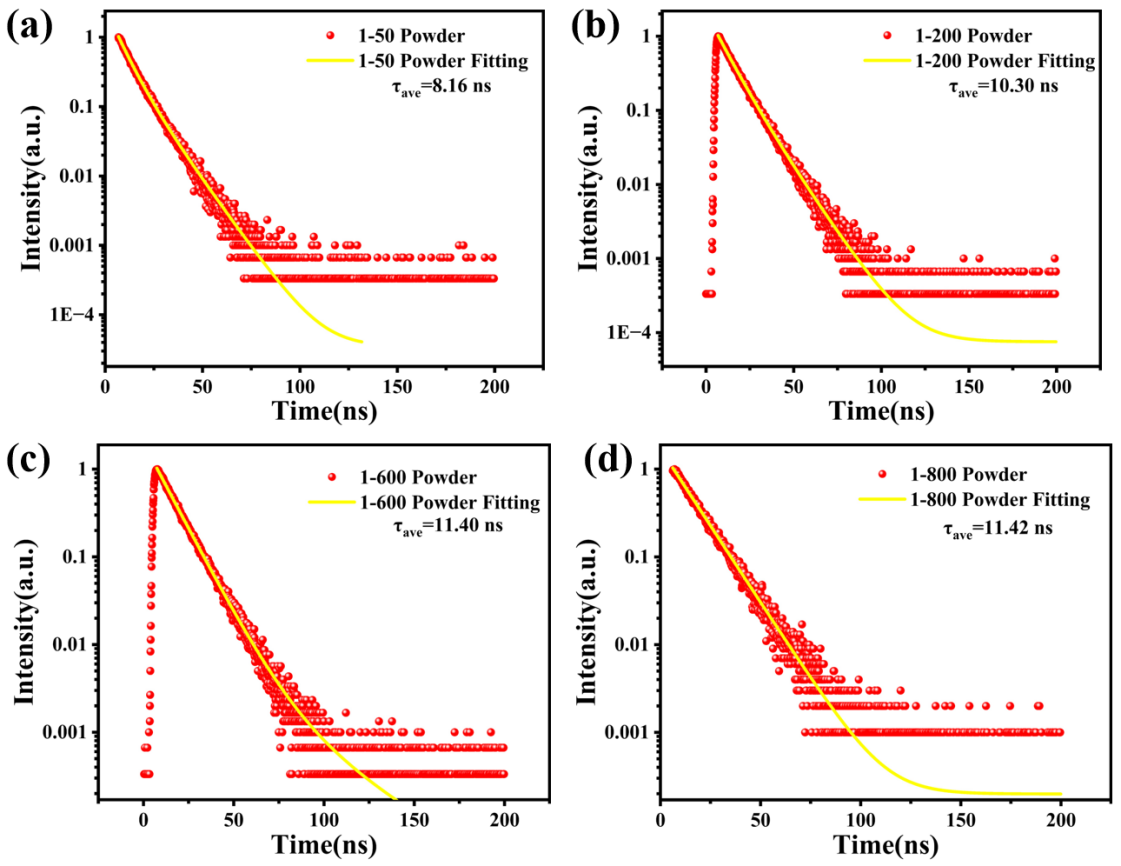


**Figure S7.** Fluorescence lifetime decay curves of the P(KLNVC-*co*-AM) copolymers.


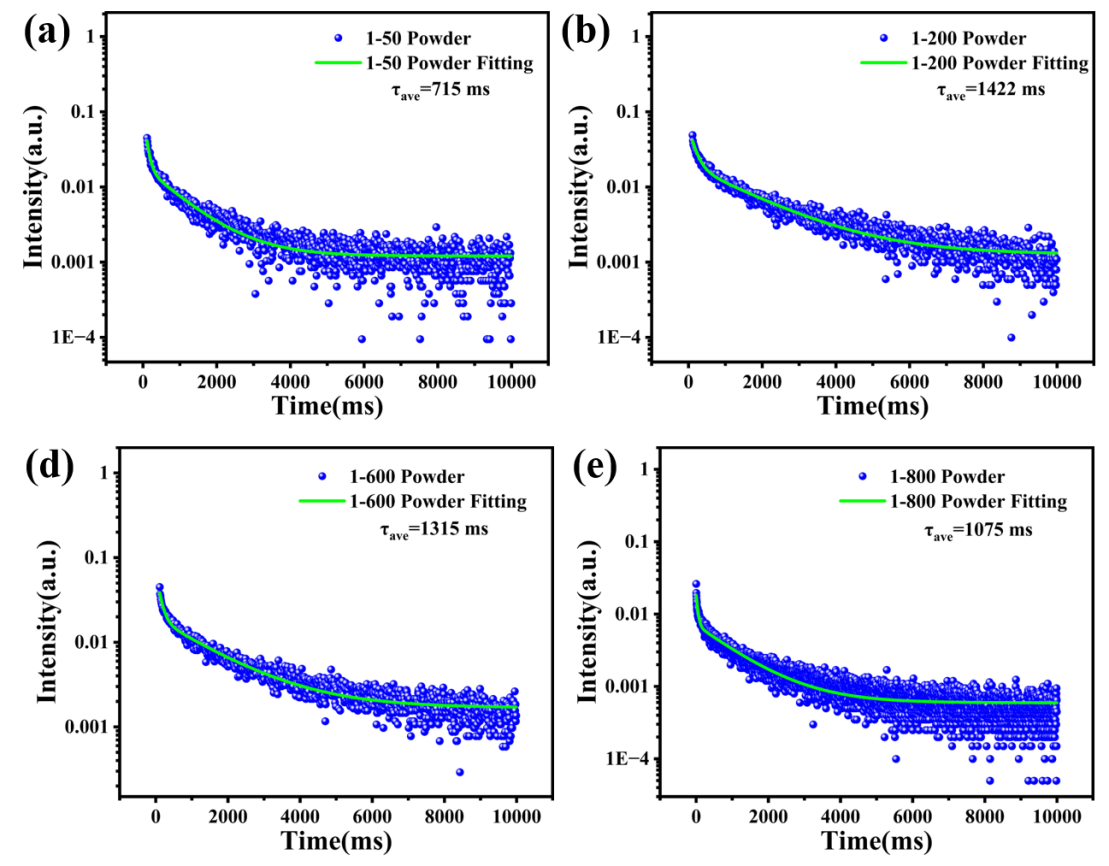


**Figure S8.** Phosphorescence lifetime decay curves of the P(KLNVC-*co*-AM) copolymers.


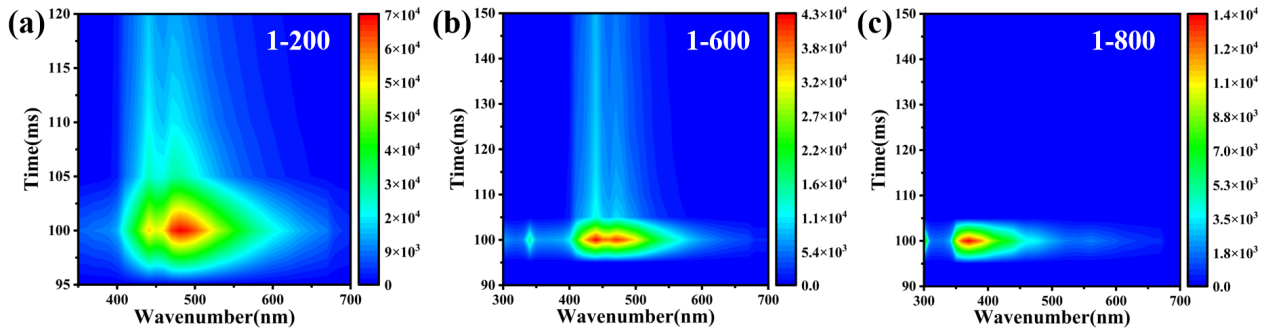


**Figure S9.** Time-resolved emission fluorescence spectra of the P(KLNVC-*co*-AM) copolymers.


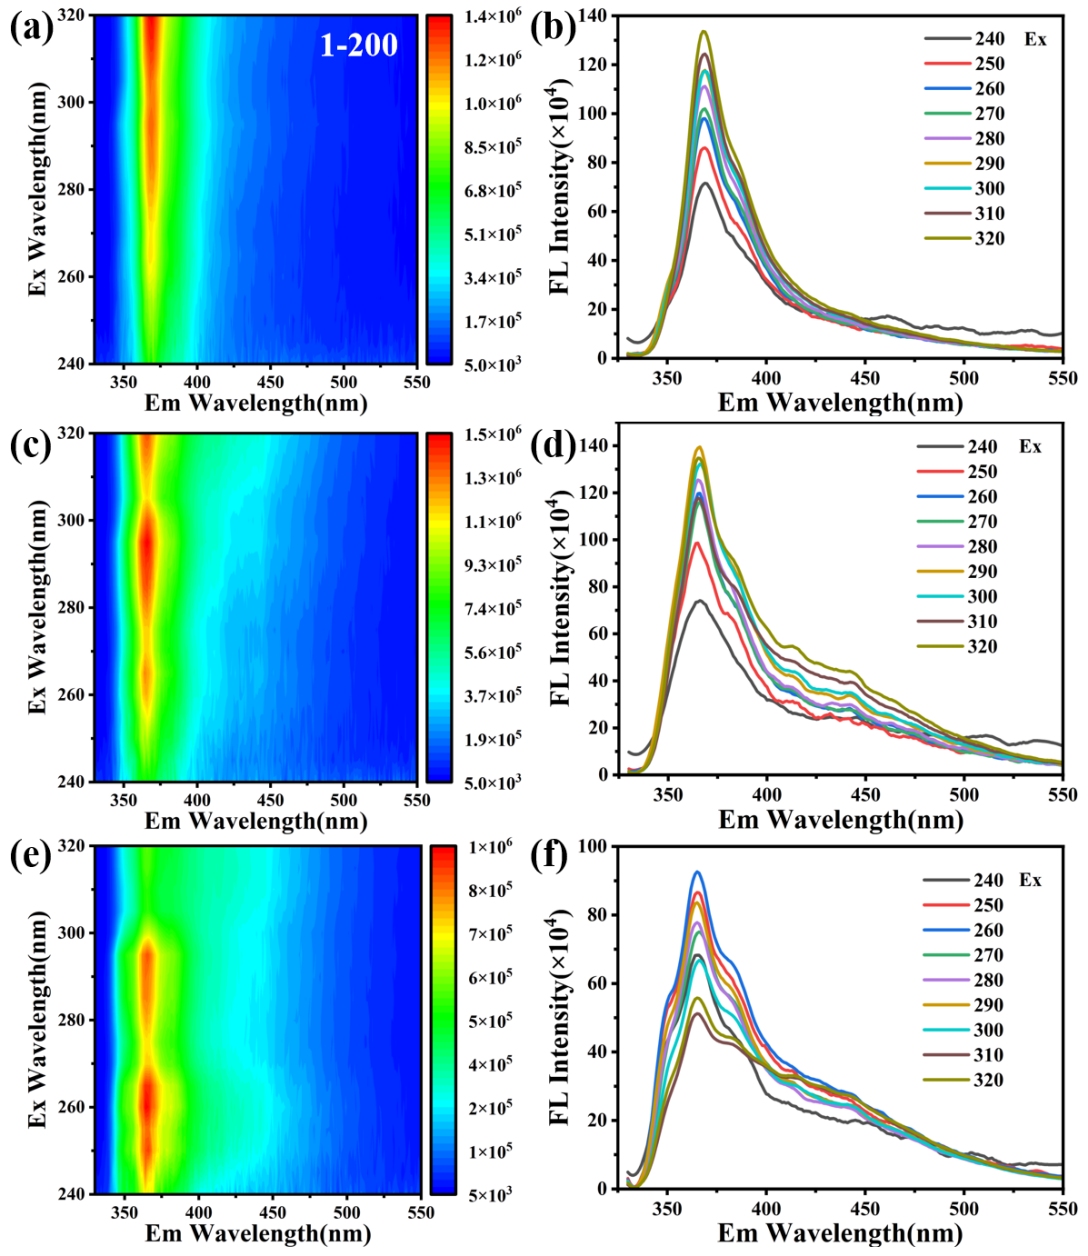


**Figure S10.** Three-dimensional fluorescence spectra of the P(KLNVC-*co*-AM) copolymers.


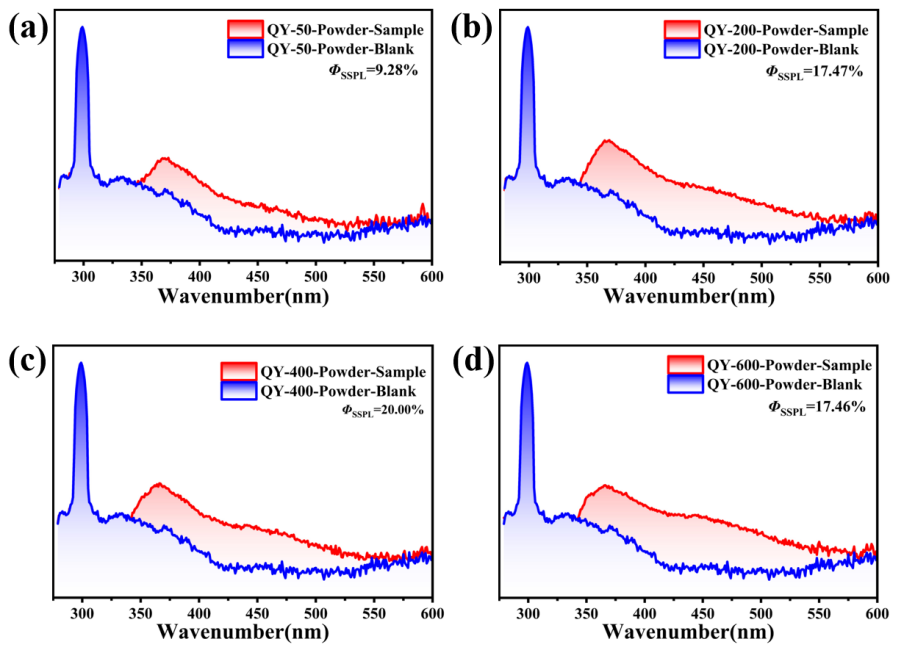


**Figure S11.** Fluorescence quantum yield of the P(KLNVC-*co*-AM) copolymers at room temperature: 1-50 (a), 1-200(b), 1-400 (c) and 1-600 (d).


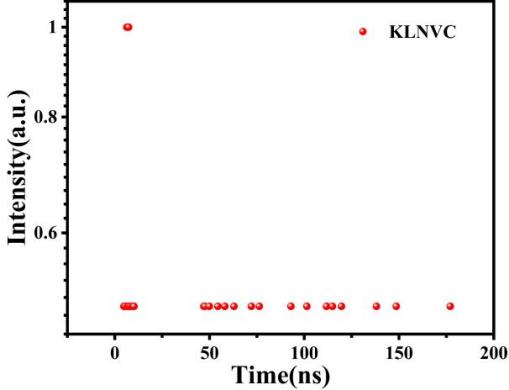


**Figure S12.** Fluorescence lifetime decay curve of theKLNVC monomer.


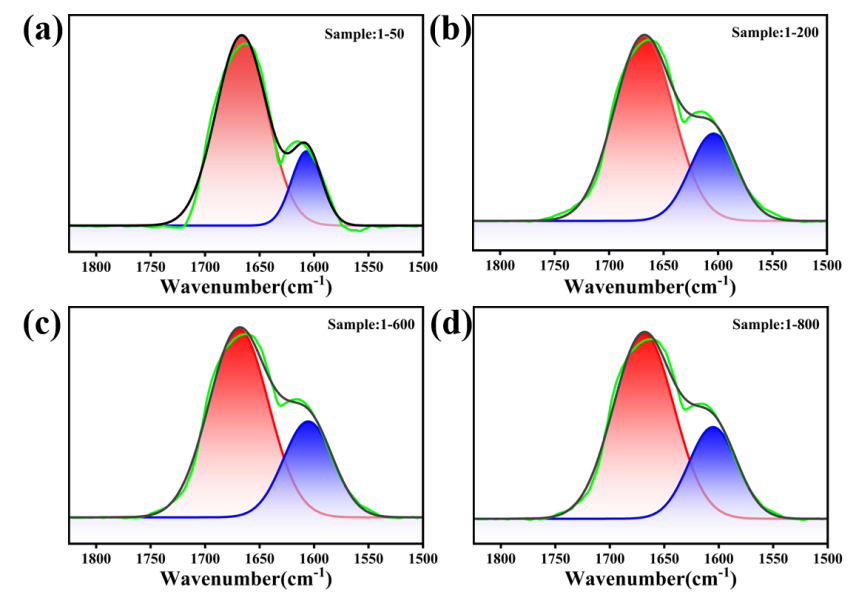


**Figure S13.** Analysis of hydrogen-bonding interactions of the P(KLNVC-*co*-AM) copolymers.


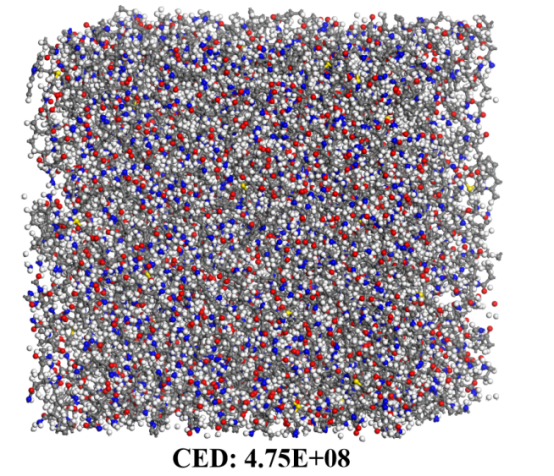


**Figure S14.** Cohesive energy simulation analysis of the P(KLNVC-*co*-AM) (1-50) copolymer.


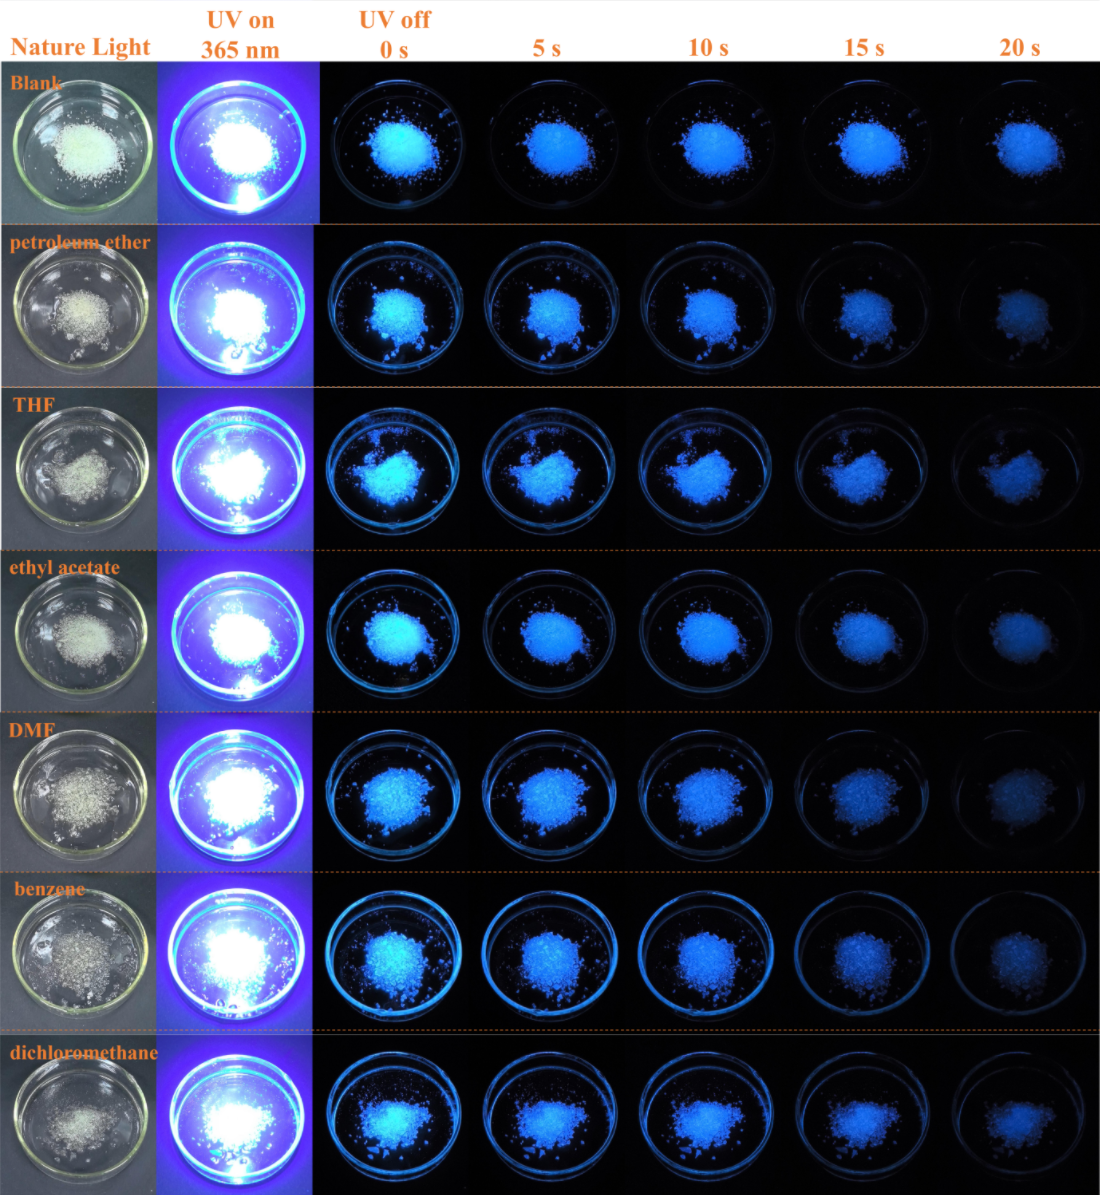


**Figure S15.** Effect of solvent‑immersion treatments on the RTP properties of the P(KLNVC-*co*-AM) copolymers.


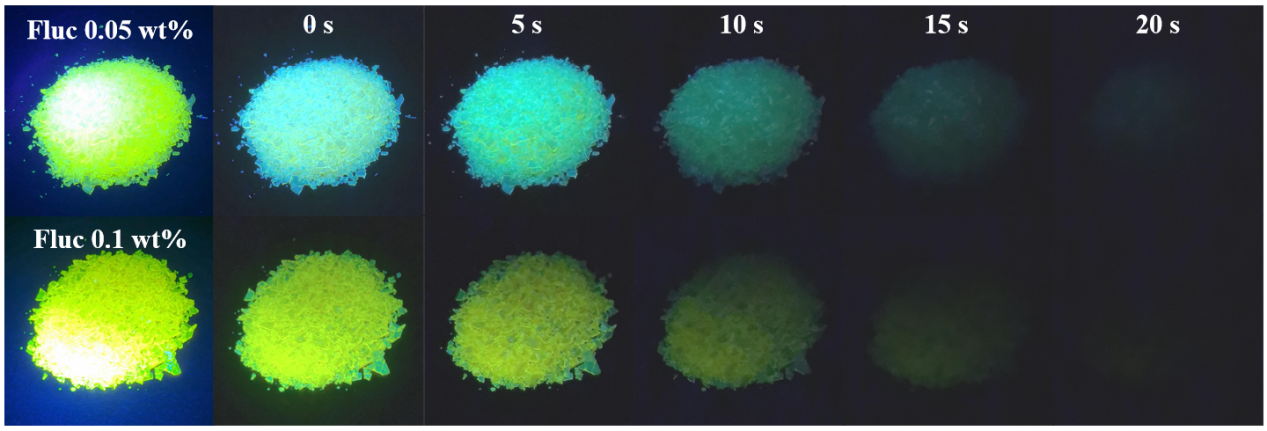


**Figure S16.** RTP photographs of the P(KLNVC-*co*-AM)@Fluc with UV light (365 nm, 56 mW/cm2) excitation for 10 s.


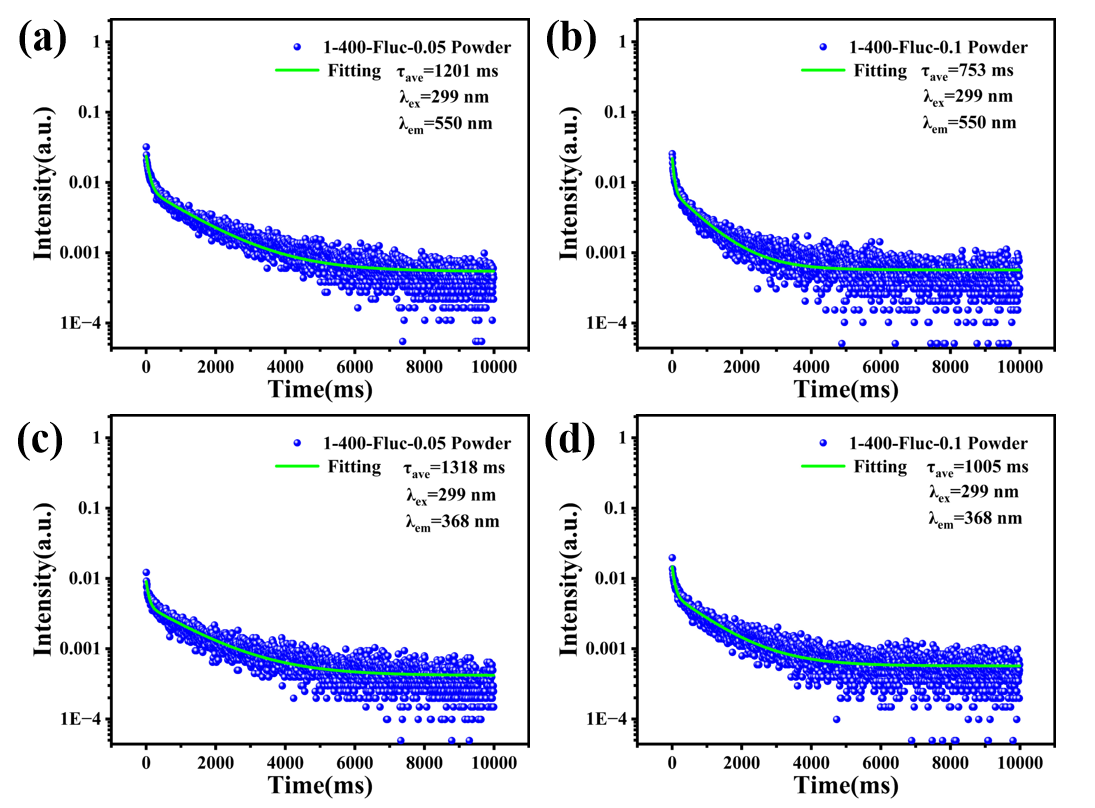


**Figure S17.** Fluorescence lifetime decay curves of the P(KLNVC-*co*-AM)@Fluc with with different Fluc loadings.

**Table S1** The molecular weight and dispersity of the P(KLNVC-*co*-AM).

| **Sample** | **a*M*n** | **b*M*w** | **c*Đ*** |
| --- | --- | --- | --- |
| 1-400 | 17100 | 30100 | 1.76 |

a*M*n number-average molar mass; b*M*w weight-average molecular weight; c dispersity (*Đ*) = *M*w/*M*n

**Table S2** The thermal performance analysis of the P(KLNVC-*co*-AM).

| **Sample** | **Td-5%(℃)** | **Td-10%(℃)** | **Tg(℃)** |
| --- | --- | --- | --- |
| 1-50 | 229.9 | 264.7 | 58.6 |
| 1-200 | 233.6 | 269.9 | 58.3 |
| 1-400 | 229.9 | 267.5 | 58.8 |
| 1-600 | 212.7 | 257.5 | 58.4 |
| 1-800 | 228.4 | 257.9 | 59.1 |

**Table S3** The CIE diagrams of the P(KLNVC-*co*-AM).

| **Sample** | **SSPL** | **Delayed PL** |
| --- | --- | --- |
| 1-50 | (0.19, 0.14) | (0.27, 0.27) |
| 1-200 | (0.17, 0.12) | (0.25, 0.24) |
| 1-400 | (0.17, 0.12) | (0.24, 0.23) |
| 1-600 | (0.19, 0.14) | (0.21, 0.18) |
| 1-800 | (0.15, 0.11) | (0.28, 0.27) |

**Table S4** Interaction energy between the cazole and acrylamide group.

| **Sample** | **acrylamide** | **cazole** |
| --- | --- | --- |
| Geometry | 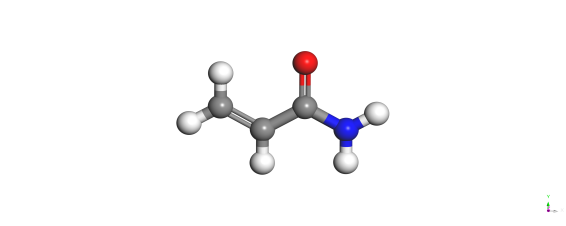 | 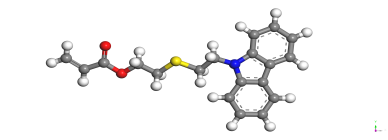 |
| IAE (kcal/mol) | -72.50 | -50.14 |

**References**

1. Lim, H. S., Han, J. T., Kwak, D., Jin, M. & Cho, K. Photoreversibly switchable superhydrophobic surface with erasable and rewritable pattern. *J. Am. Chem. Soc.* **128**, 14458-14459 (2026).

2. Zhang, Z. Y., Xu, W. W., Xu, W. S., Niu, J., Sun, X. H. & Liu, Y. A synergistic enhancement strategy for realizing ultralong and efficient room-temperature phosphorescence. *Angew. Chem. Int. Ed.* **59**, 18748-18754 (2020).
